# Supplementary material for: Sound iconicity of abstract concepts: Place of articulation is implicitly associated with abstract concepts of size and social dominance
Source: PLoS One. 2017 Nov 1;12(11):e0187196. doi: 10.1371/journal.pone.0187196 (PMC5665516; doi:10.1371/journal.pone.0187196)
Supplement: S2 Dataset — Folder contains data of three pre-tests (Experiment 3). In three questionnaires participants were asked to allocate visual stimuli to one of four basic emotions (pre-test 1), to categorize the emotions expressed by the stimuli (pre-test 2), and to assess the shape and size of the stimuli (pre-test 3). (ZIP) [file pone.0187196.s004.zip]

Archive with 3 entries (3 files):
- S3 Data-files Pre-Tests/Pre-test 1 - basic-emotions.dat
- S3 Data-files Pre-Tests/Pre-test 2 - emotional communication.dat
- S3 Data-files Pre-Tests/Pre-test 3 - shape and size.dat
