# Supplementary material for: Sound iconicity of abstract concepts: Place of articulation is implicitly associated with abstract concepts of size and social dominance
Source: PLoS One. 2017 Nov 1;12(11):e0187196. doi: 10.1371/journal.pone.0187196 (PMC5665516; doi:10.1371/journal.pone.0187196)
Supplement: S2 Dataset — Folder contains data of three pre-tests (Experiment 3). In three questionnaires participants were asked to allocate visual stimuli to one of four basic emotions (pre-test 1), to categorize the emotions expressed by the stimuli (pre-test 2), and to assess the shape and size of the stimuli (pre-test 3). (ZIP) [file pone.0187196.s004.zip › S3 Data-files Pre-Tests/Pre-test 1 - basic-emotions.dat]

lfd	emotion	No_stimulus	fear	anger	joy	sadness	age	sex	language
1	1	1	0	0	1	0	19	1	1
2	2	4	0	1	0	0	19	2	1
3	2	3	0	1	0	0	19	2	1
4	1	4	1	0	0	0	19	2	1
5	1	3	1	0	0	0	19	1	1
6	2	1	1	0	0	0	20	2	1
7	2	3	0	1	0	0	19	2	1
8	2	2	1	0	0	0	19	2	1
9	2	1	0	1	0	0	19	2	1
10	2	2	0	1	0	0	18	2	1
11	1	4	0	1	0	0	19	2	1
12	1	2	1	0	0	0	19	2	1
13	1	3	1	0	0	0	19	2	1
14	2	4	0	1	0	0	19	2	1
15	2	3	0	1	0	0	20	1	1
16	2	4	0	1	0	0	20	2	1
17	2	3	0	1	0	0	19	2	1
18	1	4	1	0	0	0	20	1	1
19	2	2	0	1	0	0	19	2	1
20	2	1	0	1	0	0	19	2	1
22	1	2	1	0	0	0	19	1	1
23	1	1	1	0	0	0	20	1	1
24	1	2	1	0	0	0	21	1	1
25	1	3	0	0	0	1	21	2	1
26	2	3	0	1	0	0	20	1	1
27	2	2	0	1	0	0	21	2	1
28	1	1	1	0	0	0	22	1	1
29	1	4	1	0	0	0	21	2	1
30	1	3	0	0	0	0	21	2	1
31	1	2	1	0	0	0	21	2	1
32	2	2	0	1	0	0	20	1	1
33	1	3	1	0	0	0	20	2	1
34	2	1	0	1	0	0	20	2	1
35	1	1	1	0	0	0	20	2	1
36	2	4	0	1	0	0	20	1	1
37	1	2	1	0	0	0	20	1	1
38	1	3	1	0	0	0	20	1	1
39	2	4	0	1	0	0	20	2	1
40	1	2	1	0	0	0	20	1	1
41	1	1	1	0	0	0	19	2	1
42	2	4	0	0	0	1	20	2	1
43	2	2	0	1	0	0	19	2	1
44	1	4	1	0	0	0	21	2	1
45	2	1	0	1	0	0	20	2	1
46	2	1	0	1	0	0	19	2	1
47	2	3	0	1	0	0	20	2	1
48	2	3	0	1	0	0	20	2	1
49	2	2	0	1	0	0	20	2	1
50	1	4	1	0	0	0	20	1	1
51	2	1	0	1	0	0	21	2	1
52	1	1	1	0	0	0		2	1
53	2	4	0	1	0	0	21	2	1
