# Supplementary material for: Sound iconicity of abstract concepts: Place of articulation is implicitly associated with abstract concepts of size and social dominance
Source: PLoS One. 2017 Nov 1;12(11):e0187196. doi: 10.1371/journal.pone.0187196 (PMC5665516; doi:10.1371/journal.pone.0187196)
Supplement: S2 Dataset — Folder contains data of three pre-tests (Experiment 3). In three questionnaires participants were asked to allocate visual stimuli to one of four basic emotions (pre-test 1), to categorize the emotions expressed by the stimuli (pre-test 2), and to assess the shape and size of the stimuli (pre-test 3). (ZIP) [file pone.0187196.s004.zip › S3 Data-files Pre-Tests/Pre-test 2 - emotional communication.dat]

lfd	emotion	No_stimulus	dominant	contented	inquisitive	affectionate	aroused	age	sex	language
1	1	1	2	2	4	1	7	19	2	1
2	1	4	2	3	3	2	4	18	2	1
3	2	2	6	1	6	2	7	19	2	1
4	2	1	6	5	5	4	5	19	2	1
5	1	2	4	2	2	1	4	19	2	1
6	2	3	6	2	3	3	5	18	2	1
7	1	3	3	3	4	4	4	19	2	1
8	1	1	3	1	6	1	7	19	1	1
9	1	4	3	3	4	1	4	19	2	1
10	1	3	2	1	3	1	6	19	2	1
11	1	2	3	2	7	4	3	25	1	1
12	2	2	6	1	7	1	7	19	2	1
13	2	1	6	2	3	4	4	20	2	1
14	2	4	6	2	2	4	7	19	2	1
15	2	3	7	2	4	2	4	19	1	1
16	2	3	5	1	6	2	6		1	1
17	2	2	6	2	6	3	6	19	2	1
18	2	1	6	2	6	2	6	19	2	1
19	1	4	1	1	2	2	6	19	2	1
20	1	3	3	3	4	3	6	19	2	1
21	1	1	1	2	4	1	5	20	1	1
22	2	4	6	2	4	2	5	21	1	1
23	1	1	3	2	4	1	4	19	2	1
24	1	3	2	2	4	1	5	19	1	1
25	1	2	2	1	6	1	5	19	1	1
26	1	4	4	1	3	1	5	19	1	1
27	2	1	7	2	3	3	5	19	1	1
28	2	2	6	3	5	4	6	20	2	1
29	2	3	5	2	4	3	5	18	1	1
30	1	4	3	3	4	2	5	19	2	1
31	2	4	7	5	1	4	3	19	2	1
32	2	1	4	2	4	2	5	19	2	1
33	1	1	4	1	4	1	4	21	1	1
34	1	2	7	2	4	2	5	20	1	1
35	1	3	2	1	4	1	4	19	1	1
36	1	4	6	3	6	2	4	19	1	1
37	2	3	6	5	3	4	2	18	2	1
38	2	2	6	2	5	3	6	19	2	1
39	2	1	7	3	2	3	3	19	2	1
40	2	4	5	6	4	4	4	20	2	1
