# Supplementary material for: Sound iconicity of abstract concepts: Place of articulation is implicitly associated with abstract concepts of size and social dominance
Source: PLoS One. 2017 Nov 1;12(11):e0187196. doi: 10.1371/journal.pone.0187196 (PMC5665516; doi:10.1371/journal.pone.0187196)
Supplement: S2 Dataset — Folder contains data of three pre-tests (Experiment 3). In three questionnaires participants were asked to allocate visual stimuli to one of four basic emotions (pre-test 1), to categorize the emotions expressed by the stimuli (pre-test 2), and to assess the shape and size of the stimuli (pre-test 3). (ZIP) [file pone.0187196.s004.zip › S3 Data-files Pre-Tests/Pre-test 3 - shape and size.dat]

lfd	emotion	No_stimulus	angular	big	age	sex	language
35	2	1	4	5	19	2	1
36	2	1	6	5	19	1	1
37	1	4	6	4	19	1	1
38	2	2	5	5	19	1	1
39	1	1	5	6	19	1	1
40	2	4	6	6	19	1	1
41	2	4	6	3	19	1	1
42	2	2	6	7	18	2	1
43	1	4	7	4	19	1	1
44	2	3	7	6	18	2	1
45	1	2	1	7	19	1	1
46	2	3	7	5			1
47	1	3	6	7	18	1	1
48	2	4	7	4	20	2	1
49	1	1	1	3	18	1	1
50	1	3	4	4	19	1	1
51	1	2	4	5	18	1	1
52	2	3	7	7	21	1	1
53	2	1	7	5	20	2	1
54	1	3	5	7	21	2	1
55	1	1	2	5	20	1	1
56	2	1	5	5	21	1	1
57	2	2	7	7	20	1	1
58	2	1	7	7	20	2	1
59	2	3	5	4	20	1	1
60	1	2	4	7	19	1	1
61	2	3	7	6	20	1	1
62	2	2	5	6	20	1	1
63	2	4	6	4	20	1	1
64	1	3	5	6	20	1	1
65	1	4	4	4	20	2	1
66	2	2	6	7	21	1	1
67	2	4	6	4	21	1	1
68	1	1	4	4	20	1	1
69	1	2	5	6	22	1	1
70	1	4	1	4	20	2	1
